# Supplementary material for: Incidence and trend of preterm birth in China, 1990–2016: a systematic review and meta-analysis
Source: HighWire-hosted journal article supplement (doi:10.1136/bmjopen-2020-039303), 2020-12-01
Supplement: bmjopen-2020-039303supp003_data_supplement.pdf [file bmjopen-2020-039303supp003_data_supplement.pdf]

Table S3: Included studies of preterm birth in China, 1990-2016

| Included studies                   | Midpoint year of data collection | Administration region of China | Livebirths/<br>All births/<br>Unknown births* | Singletons or multiples | Method of estimating GA (Ultrasound/LMP/Both/Unknown) ‡ | Total births | Study design† | Quality score |
|------------------------------------|----------------------------------|--------------------------------|-----------------------------------------------|-------------------------|---------------------------------------------------------|--------------|---------------|---------------|
| Han W et al (2011) <sup>24</sup>   | 2006                             | Central                        | all                                           | both                    | both                                                    | 26760        | cohort        | 5             |
| He Y et al (2014) <sup>25</sup>    | 2010                             | Central                        | live                                          | singletons              | UK                                                      | 6102         | cohort        | 7             |
| Xu X et al (2014) <sup>26</sup>    | 2011                             | Central                        | live                                          | UK                      | UK                                                      | 6270         | cohort        | 8             |
| Xu H et al (2015) <sup>27</sup>    | 2007                             | Central                        | live                                          | both                    | both                                                    | 818481       | XS            | 6             |
| Guo Y et al (2015) <sup>28</sup>   | 2012                             | Central                        | UK                                            | singletons              | both                                                    | 1031         | cohort        | 6             |
| Qian ZM et al (2016) <sup>29</sup> | 2012                             | Central                        | live                                          | singletons              | LMP                                                     | 95911        | cohort        | 7             |
| Yang J et al (2016) <sup>30</sup>  | 2013                             | Central                        | live                                          | singletons              | both                                                    | 5364         | cohort        | 6             |
| Zhang B et al (2016) <sup>31</sup> | 2012                             | Central                        | live                                          | singletons              | both                                                    | 76695        | cohort        | 7             |
| Hu RY et al (2017) <sup>32</sup>   | 2013                             | Central                        | live                                          | singletons              | both                                                    | 317463       | cohort        | 6             |
| Chen X et al (2018) <sup>33</sup>  | 2013                             | Central                        | live                                          | singletons              | ultrasound                                              | 7291         | cohort        | 7             |
| Huang X et al (2018) <sup>34</sup> | 2016                             | Central                        | live                                          | singletons              | UK                                                      | 16780        | cohort        | 5             |
| Huo W et al (2018) <sup>35</sup>   | 2014                             | Central                        | UK                                            | UK                      | LMP                                                     | 1006         | cohort        | 7             |
| Li H et al (2018) <sup>36</sup>    | 2013                             | Central                        | live                                          | singletons              | LMP                                                     | 11070        | cohort        | 7             |
| Li X et al (2018) <sup>37</sup>    | 2010                             | Central                        | live                                          | singletons              | both                                                    | 6059         | cohort        | 6             |
| Li XY et al (2018) <sup>38</sup>   | 2015                             | Central                        | live                                          | singletons              | LMP                                                     | 16035        | cohort        | 5             |
| Yang J et al (2018) <sup>39</sup>  | 2015                             | Central                        | UK                                            | singletons              | UK                                                      | 2347         | cohort        | 6             |
| Xu X et al (1994) <sup>40</sup>    | 1992                             | East                           | live                                          | both                    | UK                                                      | 795          | XS            | 4             |

|                                          |      |      |      |            |      |        |        |   |
|------------------------------------------|------|------|------|------------|------|--------|--------|---|
| Li Z et al (2014) <sup>41</sup>          | 1994 | East | live | singletons | LMP  | 207936 | cohort | 5 |
| Zhang Q et al (2009) <sup>42</sup>       | 1995 | East | live | singletons | LMP  | 160700 | cohort | 7 |
| Ye RW et al (2010) <sup>43</sup>         | 1998 | East | live | singletons | UK   | 131867 | cohort | 7 |
| Guo LJ et al (2009) <sup>44</sup>        | 1998 | East | live | singletons | UK   | 97447  | cohort | 7 |
| Gu WR et al (2008) <sup>45</sup>         | 2000 | East | all  | both       | UK   | 24199  | XS     | 6 |
| Ma X et al (2009) <sup>46</sup>          | 2007 | East | live | UK         | LMP  | 44362  | XS     | 5 |
| Li Y et al (2014) <sup>47</sup>          | 2011 | East | live | singletons | UK   | 592    | cohort | 6 |
| Yan SQ et al (2013) <sup>48</sup>        | 2009 | East | live | singletons | UK   | 4448   | cohort | 6 |
| Tong JG et al (2013) <sup>49</sup>       | 2010 | East | live | singletons | UK   | 2409   | XS     | 7 |
| Sun L et al (2013) <sup>50</sup>         | 2010 | East | live | both       | LMP  | 60280  | XS     | 7 |
| Sun LY et al (2014) <sup>51</sup>        | 2010 | East | all  | both       | UK   | 60615  | XS     | 7 |
| Ge X et al (2016) <sup>52</sup>          | 2014 | East | live | singletons | both | 3197   | cohort | 6 |
| Cui AM et al (2016) <sup>53</sup>        | 2013 | East | UK   | UK         | UK   | 21004  | cohort | 7 |
| Ding XX et al (2016) <sup>54</sup>       | 2009 | East | live | singletons | both | 10251  | cohort | 7 |
| Wang H et al (2016) <sup>55</sup>        | 2009 | East | live | singletons | LMP  | 3254   | cohort | 7 |
| Xue QQ et al (2016) <sup>56</sup>        | 2011 | East | live | both       | UK   | 37443  | XS     | 6 |
| Zhou SS et al (2016) <sup>57</sup>       | 2013 | East | live | singletons | both | 3256   | cohort | 7 |
| Liu A et al (2017) <sup>58</sup>         | 2013 | East | live | UK         | UK   | 195400 | XS     | 3 |
| Reyihanguli M et al (2017) <sup>59</sup> | 2014 | East | live | singletons | both | 2758   | cohort | 6 |
| Wang JX et al (2017) <sup>60</sup>       | 2012 | East | live | singletons | UK   | 2108   | XS     | 4 |
| Wang JX et al (2017) <sup>60</sup>       | 2013 | East | live | singletons | UK   | 2010   | XS     | 4 |
| Wang JX et al (2017) <sup>60</sup>       | 2014 | East | live | singletons | UK   | 2112   | XS     | 4 |
| Wang JX et al (2017) <sup>60</sup>       | 2015 | East | live | singletons | UK   | 1975   | XS     | 4 |
| Wang JX et al (2017) <sup>60</sup>       | 2011 | East | live | singletons | UK   | 1630   | XS     | 4 |

|                                        |      |                             |      |            |            |         |        |   |
|----------------------------------------|------|-----------------------------|------|------------|------------|---------|--------|---|
| Wang JX et al (2017) <sup>60</sup>     | 2016 | East                        | live | singletons | UK         | 2206    | XS     | 4 |
| Wang S et al (2017) <sup>61</sup>      | 2012 | East                        | UK   | UK         | UK         | 10933   | cohort | 5 |
| Zhang Y et al (2017) <sup>62</sup>     | 2014 | East                        | UK   | singletons | both       | 5737    | cohort | 2 |
| Zhang Y et al (2017) <sup>62</sup>     | 2015 | East                        | UK   | singletons | both       | 5269    | cohort | 2 |
| Han Y et al (2018) <sup>63</sup>       | 2013 | East                        | UK   | singletons | both       | 2931    | cohort | 7 |
| Han Y et al (2018) <sup>64</sup>       | 2015 | East                        | live | singletons | UK         | 6693    | cohort | 5 |
| Hu CY et al (2018) <sup>65</sup>       | 2012 | East                        | UK   | UK         | both       | 16983   | XS     | 8 |
| Lin XY et al (2018) <sup>66</sup>      | 2014 | East                        | live | singletons | both       | 49612   | cohort | 7 |
| Liu WY et al (2018) <sup>67</sup>      | 2015 | East                        | live | singletons | LMP        | 37159   | XS     | 5 |
| Shi WP et al (2018) <sup>68</sup>      | 2016 | East                        | UK   | singletons | both       | 1064    | cohort | 6 |
| Wang H et al (2018) <sup>69</sup>      | 2015 | East                        | all  | UK         | LMP        | 59190   | XS     | 5 |
| Wang Y et al (2018) <sup>70</sup>      | 2015 | East                        | UK   | UK         | UK         | 15615   | cohort | 3 |
| Xiao QY et al (2018) <sup>71</sup>     | 2012 | East                        | live | singletons | LMP        | 132783  | XS     | 6 |
| Yang J et al (2018) <sup>72</sup>      | 2007 | East                        | live | singletons | UK         | 500     | cohort | 4 |
| Ye L et al (2018) <sup>73</sup>        | 2014 | East                        | live | singletons | UK         | 24246   | cohort | 6 |
| Li ZJ et al (2019) <sup>74</sup>       | 2013 | East                        | live | singletons | both       | 3240    | cohort | 5 |
| Chen TJ et al (1996) <sup>75</sup>     | 1992 | Hong Kong, Macau and Taiwan | live | singletons | LMP        | 14307   | XS     | 4 |
| Lao TT et al (1997) <sup>76</sup>      | 1994 | Hong Kong, Macau and Taiwan | UK   | UK         | UK         | 67925   | XS     | 4 |
| Chen YH et al (2009) <sup>77</sup>     | 2002 | Hong Kong, Macau and Taiwan | live | singletons | ultrasound | 28135   | cohort | 6 |
| Hsieh WS et al (2011) <sup>78</sup>    | 2001 | Hong Kong, Macau and Taiwan | live | singletons | LMP        | 1312770 | cohort | 6 |
| Leung T et al (2008) <sup>79</sup>     | 2000 | Hong Kong, Macau and Taiwan | all  | singletons | UK         | 29303   | cohort | 5 |
| Shiao LW et al (2012) <sup>80</sup>    | 2005 | Hong Kong, Macau and Taiwan | live | both       | both       | 20090   | cohort | 7 |
| Liu CY et al (2008) <sup>81</sup>      | 2005 | Hong Kong, Macau and Taiwan | all  | singletons | UK         | 27077   | XS     | 5 |
| Xirasagar S et al (2011) <sup>82</sup> | 2005 | Hong Kong, Macau and Taiwan | live | singletons | both       | 3267    | cohort | 6 |

|                                           |      |                             |      |            |            |        |        |   |
|-------------------------------------------|------|-----------------------------|------|------------|------------|--------|--------|---|
| Lao TT et al (2011) <sup>83</sup>         | 2003 | Hong Kong, Macau and Taiwan | UK   | singletons | ultrasound | 66443  | cohort | 6 |
| Lau Y et al (2013) <sup>84</sup>          | 2009 | Hong Kong, Macau and Taiwan | UK   | UK         | LMP        | 581    | cohort | 6 |
| Chung WH et al (2017) <sup>85</sup>       | 1997 | Hong Kong, Macau and Taiwan | UK   | singletons | UK         | 17600  | XS     | 2 |
| Chung WH et al (2017) <sup>85</sup>       | 2002 | Hong Kong, Macau and Taiwan | UK   | singletons | UK         | 19603  | XS     | 2 |
| Chung WH et al (2017) <sup>85</sup>       | 2007 | Hong Kong, Macau and Taiwan | UK   | singletons | UK         | 24506  | XS     | 2 |
| Chung WH et al (2017) <sup>85</sup>       | 2012 | Hong Kong, Macau and Taiwan | UK   | singletons | UK         | 24553  | XS     | 2 |
| Lai YJ et al (2017) <sup>86</sup>         | 2012 | Hong Kong, Macau and Taiwan | UK   | singletons | UK         | 1187   | cohort | 5 |
| Spracklen CN et al (2017) <sup>87</sup>   | 2009 | Hong Kong, Macau and Taiwan | UK   | singletons | UK         | 1989   | cohort | 6 |
| Chaemsaitong P et al (2018) <sup>88</sup> | 2013 | Hong Kong, Macau and Taiwan | UK   | singletons | ultrasound | 61807  | cohort | 6 |
| Zhou LM et al (1998) <sup>89</sup>        | 1992 | multi-provinces             | live | singletons | LMP        | 829    | cohort | 5 |
| Lin L et al (2002) <sup>90</sup>          | 1998 | multi-provinces             | live | both       | UK         | 22350  | XS     | 6 |
| Liu Y et al (2011) <sup>91</sup>          | 2000 | multi-provinces             | live | singletons | LMP        | 935998 | cohort | 7 |
| Liu L et al (2007) <sup>92</sup>          | 1993 | multi-provinces             | live | singletons | LMP        | 55975  | cohort | 6 |
| Liu L et al (2007) <sup>92</sup>          | 1994 | multi-provinces             | live | singletons | LMP        | 63763  | cohort | 6 |
| Liu L et al (2007) <sup>92</sup>          | 1995 | multi-provinces             | live | singletons | LMP        | 56570  | cohort | 6 |
| Liu L et al (2007) <sup>92</sup>          | 1996 | multi-provinces             | live | singletons | LMP        | 48331  | cohort | 6 |
| Liu L et al (2007) <sup>92</sup>          | 1997 | multi-provinces             | live | singletons | LMP        | 44151  | cohort | 6 |
| Liu L et al (2007) <sup>92</sup>          | 1998 | multi-provinces             | live | singletons | LMP        | 42840  | cohort | 6 |
| Sun JQ et al (2014) <sup>93</sup>         | 2005 | multi-provinces             | live | both       | UK         | 5277   | XS     | 5 |
| Wang T et al (2011) <sup>94</sup>         | 1999 | multi-provinces             | live | singletons | LMP        | 352477 | cohort | 7 |
| Zhang J et al (2008) <sup>95</sup>        | 1995 | multi-provinces             | UK   | singletons | LMP        | 202216 | cohort | 6 |
| Zhang J et al (2008) <sup>95</sup>        | 1997 | multi-provinces             | UK   | singletons | LMP        | 206430 | cohort | 6 |
| Zhang J et al (2008) <sup>95</sup>        | 1999 | multi-provinces             | UK   | singletons | LMP        | 175598 | cohort | 6 |

|                                      |      |                 |      |            |      |         |        |   |
|--------------------------------------|------|-----------------|------|------------|------|---------|--------|---|
| Zhang J et al (2008) <sup>95</sup>   | 2001 | multi-provinces | UK   | singletons | LMP  | 139078  | cohort | 6 |
| Zhang J et al (2008) <sup>95</sup>   | 2003 | multi-provinces | UK   | singletons | LMP  | 154585  | cohort | 6 |
| Souza JP et al (2010) <sup>96</sup>  | 2008 | multi-provinces | live | both       | UK   | 14628   | XS     | 8 |
| Zhu L et al (2015) <sup>17</sup>     | 2013 | multi-provinces | live | singletons | both | 159334  | XS     | 7 |
| Chen YL et al (2015) <sup>97</sup>   | 2011 | multi-provinces | live | UK         | both | 103678  | XS     | 7 |
| Chen Y et al (2016) <sup>98</sup>    | 2011 | multi-provinces | all  | both       | both | 103678  | XS     | 8 |
| Hou L et al (2014) <sup>99</sup>     | 2011 | multi-provinces | UK   | singletons | UK   | 109722  | XS     | 7 |
| Luo XL et al (2015) <sup>100</sup>   | 2011 | multi-provinces | live | both       | LMP  | 111767  | XS     | 8 |
| Ye C et al (2014) <sup>101</sup>     | 2011 | multi-provinces | all  | UK         | UK   | 112386  | XS     | 6 |
| Zou L et al (2014) <sup>16</sup>     | 2011 | multi-provinces | all  | both       | LMP  | 109705  | XS     | 6 |
| Souza JP et al (2013) <sup>102</sup> | 2011 | multi-provinces | live | both       | UK   | 13215   | XS     | 8 |
| Yang Y et al (2015) <sup>103</sup>   | 2012 | multi-provinces | live | singletons | LMP  | 367425  | cohort | 7 |
| Huang AQ et al (2018) <sup>104</sup> | 2014 | multi-provinces | live | singletons | LMP  | 40152   | XS     | 7 |
| Kong XY et al (2016) <sup>105</sup>  | 2013 | multi-provinces | live | UK         | LMP  | 138240  | XS     | 7 |
| Li N et al (2016) <sup>106</sup>     | 1995 | multi-provinces | live | singletons | LMP  | 44494   | cohort | 7 |
| Tang W et al (2016) <sup>107</sup>   | 2013 | multi-provinces | live | UK         | LMP  | 3915965 | XS     | 5 |
| Zhang XS et al (2016) <sup>108</sup> | 2012 | multi-provinces | live | UK         | UK   | 111095  | XS     | 8 |
| Chen S et al (2017) <sup>109</sup>   | 2011 | multi-provinces | live | singletons | LMP  | 133232  | cohort | 7 |
| Liu J et al (2017) <sup>110</sup>    | 2011 | multi-provinces | live | singletons | UK   | 489965  | cohort | 8 |
| Li Q et al (2018) <sup>111</sup>     | 2014 | multi-provinces | live | singletons | LMP  | 1240978 | cohort | 6 |
| Li Y et al (2018) <sup>112</sup>     | 2014 | multi-provinces | UK   | singletons | UK   | 6000    | XS     | 5 |
| Lin L et al (2018) <sup>113</sup>    | 2014 | multi-provinces | live | singletons | LMP  | 33204   | XS     | 7 |
| Wang C et al (2018) <sup>114</sup>   | 2014 | multi-provinces | UK   | singletons | LMP  | 21577   | XS     | 7 |
| Wang YY et al (2018) <sup>115</sup>  | 2014 | multi-provinces | live | singletons | LMP  | 1300342 | cohort | 8 |

|                                      |      |                 |      |            |      |         |        |   |
|--------------------------------------|------|-----------------|------|------------|------|---------|--------|---|
| Zhang XL et al (2018) <sup>116</sup> | 2014 | multi-provinces | UK   | singletons | LMP  | 2722274 | cohort | 6 |
| Zhang JH et al (1995) <sup>117</sup> | 1991 | North           | UK   | UK         | UK   | 600     | XS     | 5 |
| Ye R et al (2000) <sup>118</sup>     | 1997 | North           | UK   | both       | UK   | 11372   | XS     | 3 |
| Gao XL et al (2000) <sup>119</sup>   | 1996 | North           | all  | both       | UK   | 8333    | XS     | 4 |
| Qi L et al (2002) <sup>120</sup>     | 2000 | North           | UK   | UK         | UK   | 1069    | cohort | 5 |
| Zhang XF et al (2007) <sup>121</sup> | 2004 | North           | live | UK         | UK   | 45337   | XS     | 6 |
| Guo ZK et al (2010) <sup>122</sup>   | 2007 | North           | all  | both       | UK   | 15197   | XS     | 9 |
| Sun Y et al (2009) <sup>123</sup>    | 2007 | North           | UK   | UK         | UK   | 26204   | XS     | 6 |
| Qin BL et al (2011) <sup>124</sup>   | 2006 | North           | UK   | UK         | UK   | 5228    | XS     | 4 |
| Ma LL et al (2010) <sup>125</sup>    | 2008 | North           | live | both       | both | 5822    | XS     | 7 |
| Qu SH et al (2011) <sup>126</sup>    | 2009 | North           | UK   | singletons | UK   | 5370    | cohort | 4 |
| Wei YM et al (2011) <sup>127</sup>   | 2007 | North           | UK   | UK         | UK   | 14593   | cohort | 5 |
| Zhao DQ et al (2011) <sup>128</sup>  | 2009 | North           | UK   | singletons | UK   | 5266    | cohort | 5 |
| Liu JM et al (2013) <sup>129</sup>   | 2008 | North           | live | singletons | UK   | 5905    | cohort | 7 |
| Shan X et al (2014) <sup>130</sup>   | 1996 | North           | live | both       | UK   | 3498    | cohort | 5 |
| Shan X et al (2014) <sup>130</sup>   | 1997 | North           | live | both       | UK   | 3987    | cohort | 5 |
| Shan X et al (2014) <sup>130</sup>   | 1998 | North           | live | both       | UK   | 3750    | cohort | 5 |
| Shan X et al (2014) <sup>130</sup>   | 1999 | North           | live | both       | UK   | 4278    | cohort | 5 |
| Shan X et al (2014) <sup>130</sup>   | 2000 | North           | live | both       | UK   | 8528    | cohort | 5 |
| Hu XY et al (2012) <sup>131</sup>    | 2010 | North           | UK   | UK         | UK   | 1935    | XS     | 6 |
| Zhou QH et al (2013) <sup>132</sup>  | 2010 | North           | UK   | singletons | UK   | 1832    | cohort | 6 |
| Wang S et al (2013) <sup>133</sup>   | 2011 | North           | UK   | UK         | UK   | 1208    | cohort | 5 |
| Liu X et al (2012) <sup>134</sup>    | 2011 | North           | UK   | singletons | UK   | 939     | cohort | 6 |
| Wang CS et al (2013) <sup>135</sup>  | 2012 | North           | UK   | singletons | UK   | 4090    | XS     | 7 |

|                                       |      |           |      |            |      |        |        |   |
|---------------------------------------|------|-----------|------|------------|------|--------|--------|---|
| Zhang CH et al (2015) <sup>136</sup>  | 2012 | North     | live | singletons | both | 14196  | cohort | 6 |
| Shang M et al (2014) <sup>137</sup>   | 2013 | North     | UK   | singletons | UK   | 3083   | cohort | 6 |
| Wen T et al (2015) <sup>138</sup>     | 2011 | North     | live | singletons | both | 11751  | cohort | 5 |
| Barros FC et al (2015) <sup>139</sup> | 2012 | North     | all  | both       | both | 60058  | XS     | 6 |
| Han SJ et al (2016) <sup>140</sup>    | 2013 | North     | UK   | both       | UK   | 37573  | cohort | 4 |
| Maerdan M et al (2016) <sup>141</sup> | 2012 | North     | UK   | singletons | LMP  | 25328  | XS     | 3 |
| Wei YM et al (2016) <sup>142</sup>    | 2013 | North     | live | singletons | UK   | 14451  | cohort | 4 |
| Cheng YP et al (2016) <sup>143</sup>  | 2013 | North     | live | UK         | LMP  | 1839   | XS     | 8 |
| Jiang F et al (2016) <sup>144</sup>   | 1992 | North     | UK   | both       | UK   | 5248   | XS     | 5 |
| Jiang F et al (2016) <sup>144</sup>   | 1997 | North     | UK   | both       | UK   | 6195   | XS     | 5 |
| Jiang F et al (2016) <sup>144</sup>   | 2002 | North     | UK   | both       | UK   | 9117   | XS     | 5 |
| Jiang F et al (2016) <sup>144</sup>   | 2007 | North     | UK   | both       | UK   | 11564  | XS     | 5 |
| Jiang F et al (2016) <sup>144</sup>   | 2012 | North     | UK   | both       | UK   | 14544  | XS     | 5 |
| Yang WJ et al (2017) <sup>145</sup>   | 2011 | North     | UK   | singletons | UK   | 1102   | XS     | 7 |
| Wang C et al (2017) <sup>146</sup>    | 2013 | North     | UK   | singletons | UK   | 14970  | XS     | 6 |
| Zheng W et al (2018) <sup>147</sup>   | 2014 | North     | UK   | singletons | UK   | 10366  | cohort | 6 |
| Zhang X et al (2018) <sup>148</sup>   | 2016 | North     | UK   | UK         | UK   | 263157 | XS     | 5 |
| Wang ST et al (2012) <sup>149</sup>   | 2008 | Northeast | UK   | UK         | UK   | 710    | cohort | 6 |
| Xu X et al (2015) <sup>150</sup>      | 2011 | Northwest | UK   | singletons | UK   | 6181   | cohort | 4 |
| Jiang M et al (2015) <sup>151</sup>   | 2011 | Northwest | live | singletons | both | 9895   | cohort | 6 |
| Zhao N et al (2015) <sup>152</sup>    | 2011 | Northwest | live | singletons | LMP  | 8969   | cohort | 7 |
| Huang L et al (2016) <sup>153</sup>   | 2011 | Northwest | live | singletons | LMP  | 10179  | cohort | 6 |
| Wang LL et al (2016) <sup>154</sup>   | 2012 | Northwest | live | UK         | UK   | 28487  | XS     | 7 |
| Yang J et al (2017) <sup>155</sup>    | 2013 | Northwest | live | singletons | both | 7375   | XS     | 6 |

|                                       |      |           |      |            |            |         |        |   |
|---------------------------------------|------|-----------|------|------------|------------|---------|--------|---|
| Zhu XY et al (2007) <sup>156</sup>    | 2005 | South     | live | UK         | UK         | 6885    | XS     | 6 |
| Fu J et al (2011) <sup>157</sup>      | 2007 | South     | live | singletons | both       | 28052   | XS     | 5 |
| Zhou J et al (2014) <sup>158</sup>    | 2011 | South     | all  | UK         | UK         | 1953    | cohort | 7 |
| Lei Q et al (2014) <sup>159</sup>     | 2011 | South     | UK   | singletons | UK         | 3329    | cohort | 7 |
| He JR et al (2016) <sup>160</sup>     | 2006 | South     | UK   | singletons | both       | 838146  | XS     | 7 |
| Lei Q et al (2016) <sup>161</sup>     | 2013 | South     | UK   | singletons | both       | 5535    | cohort | 5 |
| Liang ZJ et al (2016) <sup>162</sup>  | 2005 | South     | live | singletons | LMP        | 94335   | XS     | 6 |
| Liang ZJ et al (2016) <sup>162</sup>  | 2006 | South     | live | singletons | LMP        | 115428  | XS     | 6 |
| Liang ZJ et al (2016) <sup>162</sup>  | 2007 | South     | live | singletons | LMP        | 146934  | XS     | 6 |
| Liang ZJ et al (2016) <sup>162</sup>  | 2008 | South     | live | singletons | LMP        | 163138  | XS     | 6 |
| Liang ZJ et al (2016) <sup>162</sup>  | 2009 | South     | live | singletons | LMP        | 158953  | XS     | 6 |
| Liang ZJ et al (2016) <sup>162</sup>  | 2010 | South     | live | singletons | LMP        | 174515  | XS     | 6 |
| Liang ZJ et al (2016) <sup>162</sup>  | 2011 | South     | live | singletons | LMP        | 187335  | XS     | 6 |
| Shen S et al (2017) <sup>163</sup>    | 2014 | South     | live | singletons | ultrasound | 12889   | cohort | 7 |
| Ke L et al (2018) <sup>164</sup>      | 2015 | South     | live | singletons | both       | 3684    | cohort | 5 |
| Li C et al (2018) <sup>165</sup>      | 2008 | South     | live | UK         | both       | 1385882 | cohort | 6 |
| Liang ZJ et al (2018) <sup>166</sup>  | 2008 | South     | live | singletons | both       | 904795  | XS     | 6 |
| Wang Q et al (2018) <sup>167</sup>    | 2016 | South     | live | singletons | both       | 469975  | cohort | 7 |
| Yangzom Y et al (2008) <sup>168</sup> | 2005 | Southwest | live | both       | both       | 2540    | cohort | 5 |
| Yang X et al (2011) <sup>169</sup>    | 2006 | Southwest | live | both       | UK         | 13024   | XS     | 6 |
| Duan L et al (2010) <sup>170</sup>    | 2005 | Southwest | live | singletons | UK         | 21043   | cohort | 8 |
| Tan CE et al (2009) <sup>171</sup>    | 2008 | Southwest | live | UK         | UK         | 6638    | cohort | 4 |
| Tan CE et al (2009) <sup>171</sup>    | 2009 | Southwest | live | UK         | UK         | 6365    | cohort | 4 |
| Liao H et al (2010) <sup>172</sup>    | 2008 | Southwest | all  | singletons | both       | 18024   | cohort | 7 |



|                                    |      |           |     |            |      |      |        |   |
|------------------------------------|------|-----------|-----|------------|------|------|--------|---|
| Liao S et al (2014) <sup>173</sup> | 2010 | Southwest | all | singletons | both | 5360 | cohort | 6 |
| Fan XJ et al (2017) <sup>174</sup> | 2009 | Southwest | UK  | singletons | LMP  | 1419 | cohort | 7 |
| Li R et al (2017) <sup>175</sup>   | 2013 | Southwest | UK  | singletons | both | 688  | cohort | 8 |

\*All births: livebirths and stillbirths. Unknown births: does not specify live birth or all births.

‡UK: unknown.

†XS: cross-sectional study. Cohort: cohort study.
