# Supplementary material for: Incidence and trend of preterm birth in China, 1990–2016: a systematic review and meta-analysis
Source: HighWire-hosted journal article supplement (doi:10.1136/bmjopen-2020-039303), 2020-12-01
Supplement: bmjopen-2020-039303supp004_data_supplement.pdf [file bmjopen-2020-039303supp004_data_supplement.pdf]

1 Table S4. Sensitivity analysis for low-quality studies on pooled incidence of preterm birth in China, 1990-2016.

| Characteristic              | Numbers of studies | Number of births | Preterm birth rate (%) |           | Heterogeneity      | Multivariate meta-regression‡ |                 |
|-----------------------------|--------------------|------------------|------------------------|-----------|--------------------|-------------------------------|-----------------|
|                             |                    |                  | Estimate               | 95%CI     | I <sup>2</sup> (%) | Coefficient                   | 95%CI           |
| Administration region*      |                    |                  |                        |           |                    |                               |                 |
| Central                     | 16                 | 1414665          | 5.67                   | 4.26-7.09 | 99.9%              | Ref                           | Ref             |
| East                        | 36                 | 1233688          | 6.11                   | 5.54-6.68 | 99.5%              | 0.006                         | -0.003 to 0.015 |
| North                       | 35                 | 594789           | 5.56                   | 4.96-6.17 | 98.8%              | -0.004                        | -0.014 to 0.006 |
| Northwest                   | 5                  | 64905            | 6.80                   | 4.29-9.31 | 99.4%              | 0.016                         | 0.001 to 0.030  |
| South                       | 18                 | 4701763          | 6.14                   | 5.96-6.32 | 98.1%              | 0.014                         | 0.004 to 0.024  |
| Southwest                   | 7                  | 62098            | 7.09                   | 4.49-9.68 | 99.3%              | 0.014                         | 0.0003 to 0.028 |
| Hong Kong, Macau and Taiwan | 13                 | 1634881          | 6.51                   | 5.83-7.19 | 99.2%              | 0.013                         | 0.001 to 0.025  |
| Multi-provinces             | 39                 | 13909524         | 6.09                   | 5.57-6.61 | 99.9%              | 0.012                         | 0.003 to 0.021  |
| Year                        |                    |                  |                        |           |                    |                               |                 |
| 1990-1994                   | 9                  | 417378           | 5.36                   | 4.89-5.84 | 96.5%              | Ref                           | Ref             |
| 1995-1999                   | 19                 | 1615512          | 4.64                   | 4.27-5.00 | 99.1%              | -0.011                        | -0.023 to 0.001 |
| 2000-2004                   | 12                 | 2754562          | 5.68                   | 4.91-6.45 | 99.8%              | -0.001                        | -0.014 to 0.012 |
| 2005-2009                   | 37                 | 4969552          | 6.74                   | 6.25-7.24 | 99.8%              | 0.008                         | -0.003 to 0.020 |
| 2010-2014                   | 81                 | 12979754         | 6.13                   | 5.80-6.47 | 99.8%              | 0.006                         | -0.005 to 0.017 |
| 2015-2016                   | 12                 | 880265           | 6.91                   | 5.89-7.94 | 99.7%              | 0.016                         | 0.003 to 0.030  |
| Denominator†                |                    |                  |                        |           |                    |                               |                 |
| Live births only            | 105                | 17708337         | 6.01                   | 5.70-6.33 | 99.9%              | Ref                           | Ref             |
| All births                  | 15                 | 661838           | 7.01                   | 5.90-8.12 | 99.7%              | 0.003                         | -0.006 to 0.011 |
| Unknown births              | 50                 | 5246848          | 6.01                   | 5.62-6.39 | 99.6%              | 0.003                         | -0.003 to 0.008 |
| Method of estimating GA     |                    |                  |                        |           |                    |                               |                 |
| LMP                         | 53                 | 15878584         | 5.81                   | 5.40-6.22 | 99.9%              | Ref                           | Ref             |
| Ultrasound                  | 5                  | 176565           | 5.47                   | 3.96-6.99 | 99.4%              | -0.003                        | -0.017 to 0.012 |
| Ultrasound and LMP          | 38                 | 5506970          | 6.51                   | 5.97-7.06 | 99.8%              | 0.003                         | -0.004 to 0.010 |
| Unknown                     | 74                 | 2054904          | 6.16                   | 5.76-6.57 | 99.3%              | 0.004                         | -0.003 to 0.010 |

|                          |     |          |      |           |       |       |                 |
|--------------------------|-----|----------|------|-----------|-------|-------|-----------------|
| Singletons/multiples     |     |          |      |           |       |       |                 |
| Singletons only          | 110 | 15617352 | 5.84 | 5.56-6.12 | 99.8% | Ref   | Ref             |
| Singletons and multiples | 31  | 1604966  | 6.82 | 5.90-7.73 | 99.8% | 0.015 | 0.008 to 0.022  |
| Unknown                  | 29  | 6394705  | 6.38 | 5.83-6.93 | 99.8% | 0.006 | -0.001 to 0.013 |

1 \*Only one study was from Northeast China, in which the preterm birth rate was 3.8% (95%CI: 2.4 - 5.21%). The meta-regression showed no significant difference  
 2 between Northeast and Central China.

3 †All births: livebirths and stillbirths. Unknown births: Does not specify live birth or all births.

4 ‡Adjusted variable: Quality level of studies.
